# Supplementary material for: Synthesis of polysubstituted 3,4-dihydro-2H-thiopyrans by regioselective annulation of 3,3-disubstituted allylic alcohols with a β-oxodithioester
Source: Royal Society of Chemistry journal article supplement (doi:10.1039/c7nj03025h), 2017-01-01

**Synthesis of polysubstituted 3,4-dihydro-2H-thiopyrans by regioselective annulation of 3,3-disubstituted allylic alcohols with a  $\beta$ -oxodithioester**

Srinivas Kurva<sup>a</sup>, Vinodkumar Sriramoju<sup>a</sup>, Sridhar Madabhushi<sup>a,\*</sup>, Jagadeesh Banu Nanubolu<sup>b</sup>

<sup>a</sup>*Fluoroorganics Division, CSIR-Indian Institute of Chemical Technology, Hyderabad-500007, India*

<sup>b</sup>*Centre for X-ray crystallography, CSIR-Indian Institute of Chemical Technology, Hyderabad-500007, India.*

Fluoroorganics Division, CSIR-Indian Institute of Chemical Technology, Hyderabad 500007, India  
Tel.:( +91)-40-27191772; fax: (+91)-40-27160387

E- mail: [smiict@gmail.com](mailto:smiict@gmail.com)

## Supporting Information

Table of contents:

|                                                                                 |         |
|---------------------------------------------------------------------------------|---------|
| X-ray crystallographic data of compound <b>3o</b> .....                         | S2      |
| Procedure for preparation of <b>3a-3q</b> .....                                 | S3      |
| Characterization data for compounds <b>3a-3q</b> .....                          | S4-S11  |
| <sup>1</sup> H and <sup>13</sup> C NMR Spectra for compounds <b>3a-3q</b> ..... | S12-S28 |

**General Information:** Melting points of all the compounds were recorded on Veego programmable melting point apparatus and are uncorrected. IR spectra were recorded on a PerkinElmer FT-IR 240-C spectrophotometer using KBr optics. <sup>1</sup>H NMR spectra were recorded on Bruker AV 300 MHz in CDCl<sub>3</sub> using TMS as internal standard. Electron Spray Ionization (ESI) and high-resolution spectra were recorded on QSTARXL hybrid MS/MS system (Applied Biosystems, USA) under electrospray ionization. All the reactions were monitored by thin layer chromatography (TLC) on precoated silica gel 60 F254 (mesh); spots were visualized with UV light. Merck silica gel (60-120 mesh) was used for column chromatography.

**Crystal data for compound 3o:** C<sub>15</sub>H<sub>17</sub>Cl<sub>1</sub>O<sub>1</sub>S<sub>2</sub>, *M* = 312.86, crystal size, 0.40 x 0.20 x 0.10 mm<sup>3</sup>, triclinic, space group *P***Error!** (No. 2), *a* = 5.8350(4), *b* = 8.6412(6), *c* = 15.4578(10) Å,  $\alpha$  = 85.662(1),  $\beta$  = 83.585(1),  $\gamma$  = 86.652(1)°, *V* = 771.32(9) Å<sup>3</sup>, *Z* = 2, *D*<sub>c</sub> = 1.347 g/cm<sup>3</sup>, *F*<sub>000</sub> = 328, CCD area detector, MoK $\alpha$  radiation,  $\lambda$  = 0.71073 Å, *T* = 293(2)K,  $2\theta_{\max}$  = 50°, 7421 reflections collected, 2701 unique (*R*<sub>int</sub> = 0.014), Final *Goof* = 1.07, *RI* = 0.0376, *wR2* = 0.1066, *R* indices based on 2701 reflections with *I* > 2σ(*I*) (refinement on *F*<sup>2</sup>), 175 parameters,  $\mu$  = 0.508 mm<sup>-1</sup>, minimum and maximum residual density = -0.23 and 0.33 e/Å<sup>3</sup>, respectively.

**CCDC 1561129** contains the supplementary crystallographic data for this paper. The data can be obtained free of charge from The Cambridge Crystallographic Data Centre via [www.ccdc.cam.ac.uk/data\\_request/cif](http://www.ccdc.cam.ac.uk/data_request/cif).

**Data collection and Structure solution:** X-ray data for BD31 compound were collected at room temperature using the Bruker Smart Apex CCD diffractometer with graphite monochromated MoK $\alpha$  radiation ( $\lambda$  = 0.71073Å) with  $\omega$ -scan method.<sup>1</sup> Preliminary lattice parameters and orientation matrices were obtained from four sets of frames. Unit cell dimensions were determined using 5082 reflections. Integration and scaling of intensity data were accomplished using SAINT program.<sup>1</sup> The structure was solved by Direct Methods

using SHELXS97 and refinement was carried out by full-matrix least-squares technique using SHELXL97.<sup>2,3</sup> Anisotropic displacement parameters were included for all non-hydrogen atoms. All H atoms were positioned geometrically and treated as riding on their parent C atoms, with C-H distances of 0.93--0.97 Å, and with  $U_{\text{iso}}(\text{H}) = 1.2U_{\text{eq}}(\text{C})$  or  $1.5U_{\text{eq}}$  for methyl atoms.

1. SMART & SAINT. Software Reference manuals. Versions 6.28a & 5.625, Bruker Analytical X-ray Systems Inc., Madison, Wisconsin, U.S.A., 2001.
2. Sheldrick, G. M. SHELXS97 and SHELXL Version 2014/7, <http://shelx.uni-ac.gwdg.de/SHELX/index.php>

**Typical procedure for synthesis of substituted dihydrothiopyran 3a:** In a 50 ml round bottom flask, 2-cyclopentylideneethanol **1a** (320 mg, 2.85mmol), methyl 3-oxo-3-phenylpropanedithioate **2a** (500 mg, 2.38 mmol) and dichloromethane (5ml ) were taken and to this mixture,  $\text{BF}_3 \cdot \text{OEt}_2$  (0.06 ml, 0.4 mmol) was added with a syringe and stirred at room temperature for 3 hours. After completion of reaction (monitored by TLC), the crude reaction mixture was diluted with chloroform (20 ml) and washed with water (20 ml) followed by brine. Then the organic layer was dried over  $\text{Na}_2\text{SO}_4$  and solvent was evaporated under vacuum. The residue was purified by column chromatography (silica gel 60-120 mesh) to obtain (7-(methylthio)-6-thiaspiro[4.5]dec-7-en-8-yl)(phenyl)methanone **3a** as a yellow liquid (0.60 g, 83%) and its characterization data is as follows:

$^1\text{H}$  NMR (300 MHz,  $\text{CDCl}_3$ ):  $\delta = 7.83$  (d,  $J = 7.17$  Hz, 2H), 7.53 (t,  $J = 7.17, 7.47$  Hz, 1H), 7.45 (t,  $J = 7.63, 7.32$  Hz, 2H), 2.56 (t,  $J = 6.41, 6.56$  Hz, 2H), 2.15 (s, 3H), 1.98-1.89 (m, 6H), 1.79-1.73 (m, 4H);  $^{13}\text{C}$  NMR (75 MHz,  $\text{CDCl}_3$ ):  $\delta = 197.2, 137.4, 133.7, 132.8, 132.6, 128.8, 128.4, 55.6, 40.0, 34.2, 27.5, 24.2, 17.6$ ; IR (thin film):  $\nu$  3059, 2952, 2868, 1660,

1264, 704  $\text{cm}^{-1}$ ; MS (ESI) 305 (M+H). ESI-HRMS obtained for  $\text{C}_{17}\text{H}_{21}\text{OS}_2$  (M+H) = 305.1023 (calculated: 305.1028).

**Characterization data obtained for compounds substituted dihydrothiopyran 3a-3q:**

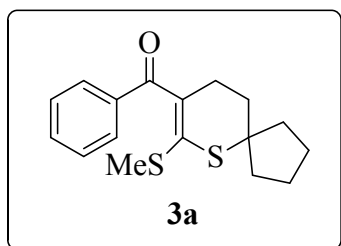

**(7-(methylthio)-6-thiaspiro[4.5]dec-7-en-8-**

**yl)(phenyl)methanone (3a):** Yield 83% (0.60 g), yellow liquid;  $^1\text{H}$  NMR (300 MHz,  $\text{CDCl}_3$ ):  $\delta$  = 7.83 (d,  $J$  = 7.17 Hz, 2H), 7.53 (t,  $J$  = 7.17, 7.47 Hz, 1H), 7.45 (t,  $J$  = 7.63, 7.32 Hz, 2H), 2.56 (t,  $J$  = 6.41, 6.56 Hz, 2H), 2.15 (s, 3H), 1.98-1.89 (m, 6H), 1.79-1.73 (m, 4H);  $^{13}\text{C}$  NMR (75 MHz,  $\text{CDCl}_3$ ):  $\delta$  = 197.2, 137.4, 133.7, 132.8, 132.6, 128.8, 128.4, 55.6, 40.0, 34.2, 27.5, 24.2, 17.6; IR (thin film):  $\nu$  3059, 2952, 2868, 1660, 1264, 704  $\text{cm}^{-1}$ ; MS (ESI) 305 (M+H). ESI-HRMS obtained for  $\text{C}_{17}\text{H}_{21}\text{OS}_2$  (M+H) = 305.1023 (calculated: 305.1028).

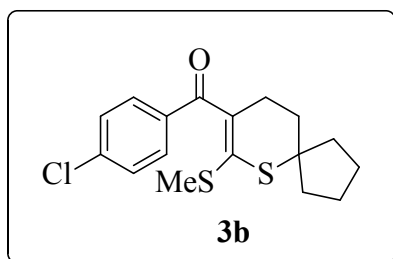

**(4-chlorophenyl)(7-(methylthio)-6-thiaspiro[4.5]dec-7-en-**

**8-yl)methanone (3b):** Yield 80% (0.55 g), yellow liquid;  $^1\text{H}$  NMR (300 MHz,  $\text{CDCl}_3$ ):  $\delta$  = 7.76 (d,  $J$  = 8.54 Hz, 2H), 7.43 (d,  $J$  = 8.39 Hz, 2H), 2.59 (t,  $J$  = 6.41, 6.56 Hz, 2H), 2.17 (s, 3H), 1.98-1.89 (m, 6H), 1.78-1.73 (m, 4H);  $^{13}\text{C}$  NMR (75 MHz,  $\text{CDCl}_3$ ):  $\delta$  = 195.9, 138.9, 136.0, 134.0, 132.9, 130.2, 128.8, 55.7, 40.1, 34.2, 27.5, 24.2, 17.6; IR (thin film):  $\nu$  3058, 2954, 2866, 1661, 1264, 706  $\text{cm}^{-1}$ ; MS (ESI) 339 (M+H). ESI-HRMS obtained for  $\text{C}_{17}\text{H}_{20}\text{ClOS}_2$  (M+H) = 339.0561 (calculated: 339.0568).

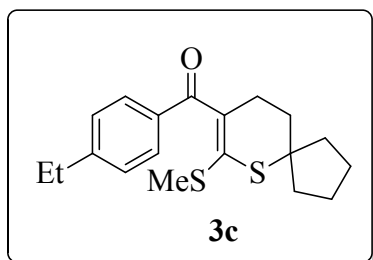

**(4-ethylphenyl)(7-(methylthio)-6-thiaspiro[4.5]dec-7-en-8-**

**yl)methanone (3c):** Yield 82% (0.57 g), yellow liquid;  $^1\text{H}$  NMR (300 MHz,  $\text{CDCl}_3$ ):  $\delta$  = 7.78 (d,  $J$  = 8.19 Hz, 2H), 7.29 (d,  $J$  = 8.19 Hz, 2H), 2.74-2.68 (q,  $J$  = 7.58, 7.58 Hz, 2H), 2.58 (t,  $J$  = 6.48, 6.60 Hz, 2H), 2.17 (s, 3H), 2.00-1.89 (m, 6H), 1.78-1.72 (m, 4H), 1.26 (t,  $J$  = 7.70, 7.58 Hz, 3H);  $^{13}\text{C}$  NMR (75 MHz,  $\text{CDCl}_3$ ):  $\delta$  = 197.1, 149.8, 134.8, 134.3, 131.2, 129.2, 128.0, 55.5, 40.1, 34.3, 28.9, 27.6, 24.2, 17.8, 15.0; IR (thin film):  $\nu$  2959, 2869, 1659, 1603, 1265, 1176  $\text{cm}^{-1}$ ; MS (ESI) 333 (M+H). ESI-HRMS obtained for  $\text{C}_{19}\text{H}_{25}\text{OS}_2$  (M+H) = 333.1387 (calculated: 333.1341).

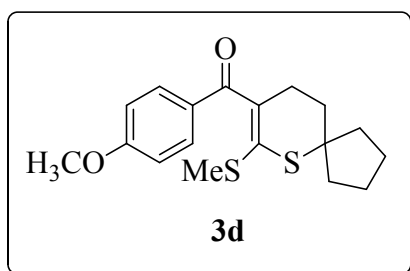

**(4-methoxyphenyl)(7-(methylthio)-6-thiaspiro[4.5]dec-7-**

**en-8-yl)methanone (3d):** Yield 77% (0.53 g), yellow liquid;  $^1\text{H}$  NMR (300 MHz,  $\text{CDCl}_3$ ):  $\delta$  = 7.85 (d,  $J$  = 9.04 Hz, 2H), 6.95 (d,  $J$  = 8.92 Hz, 2H), 3.87 (s, 3H), 2.57 (t,  $J$  = 6.48, 6.72 Hz, 2H), 2.18 (s, 3H), 1.99-1.88 (m, 6H), 1.78-1.71 (m, 4H);  $^{13}\text{C}$  NMR (75 MHz,  $\text{CDCl}_3$ ):  $\delta$  = 196.3, 163.4, 134.6, 131.4, 130.1, 129.9, 113.8, 55.5, 55.4, 40.1, 34.3, 27.6, 24.3, 17.9; IR (thin film):  $\nu$  3059, 2955, 2866, 1666, 1264, 703  $\text{cm}^{-1}$ ; MS (ESI) 335 (M+H). ESI-HRMS obtained for  $\text{C}_{19}\text{H}_{22}\text{O}_2\text{S}_2$  (M+H) = 335.1129 (calculated: 335.1134).

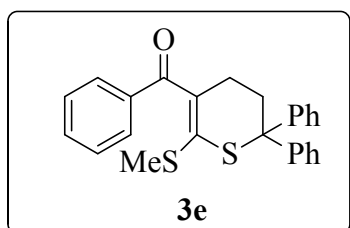

**(6-(methylthio)-2,2-diphenyl-3,4-dihydro-2H-thiopyran-5-**

**yl)(phenyl)methanone (3e):** Yield 83% (0.80 g), pale yellow solid, mp 114-116 °C; <sup>1</sup>H NMR (300 MHz, CDCl<sub>3</sub>): δ = 7.57 (d, *J* = 7.01 Hz, 2H), 7.49-7.43 (m, 5H), 7.38-7.33 (m, 6H), 7.29 (t, *J* = 7.32, 7.32 Hz, 2H), 2.87 (t, *J* = 6.40, 6.25 Hz, 2H), 2.35 (t, *J* = 6.25, 6.40 Hz, 2H), 2.25 (s, 3H); <sup>13</sup>C NMR (75 MHz, CDCl<sub>3</sub>): δ = 197.1, 143.7, 137.3, 135.5, 132.7, 131.6, 128.8, 128.5, 128.3, 127.7, 127.3, 59.2, 33.7, 27.0, 17.3; IR (KBr): ν 3447, 3059, 2925, 1661, 1442, 1263, 700 cm<sup>-1</sup>; MS (ESI) 403 (M+H). ESI-HRMS obtained for C<sub>25</sub>H<sub>23</sub>OS<sub>2</sub> (M+H) = 403.1239 (calculated: 403.1184).

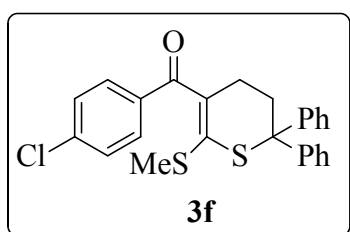

**(4-chlorophenyl)(6-(methylthio)-2,2-diphenyl-3,4-dihydro-**

**2H-thiopyran-5-yl)methanone (3f):** Yield 84% (0.75 g), pale yellow solid, mp 137-139 °C; <sup>1</sup>H NMR (300 MHz, CDCl<sub>3</sub>): δ = 7.48-7.43 (m, 6H), 7.37 (t, *J* = 7.32, 7.48 Hz, 4H), 7.31-7.29 (m, 4H), 2.88 (t, *J* = 6.40, 6.40 Hz, 2H), 2.35 (t, *J* = 6.40, 6.40 Hz, 2H), 2.26 (s, 3H); <sup>13</sup>C NMR (75 MHz, CDCl<sub>3</sub>): δ = 195.9, 143.5, 139.0, 135.7, 134.8, 132.4, 130.2, 128.6, 127.7, 127.4, 59.3, 33.7, 27.0, 17.2; IR (KBr): ν 3448, 3058, 2953, 1662, 1444, 1266, 702 cm<sup>-1</sup>; MS (ESI) 437 (M+H). ESI-HRMS obtained for C<sub>25</sub>H<sub>22</sub>OCIS<sub>2</sub> (M+H) = 437.0721 (calculated: 437.0726).

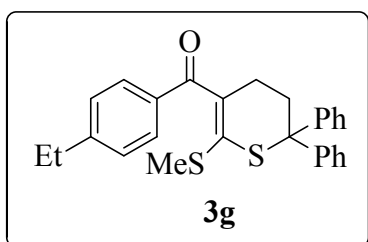

**(4-ethylphenyl)(6-(methylthio)-2,2-diphenyl-3,4-dihydro-**

**2H-thiopyran-5-yl)methanone (3g):** Yield 81% (0.73 g), pale yellow solid, mp 118-120 °C; <sup>1</sup>H NMR (300 MHz, CDCl<sub>3</sub>): δ = 7.53 (d, *J* = 8.24 Hz, 2H), 7.44 (d, *J* = 7.32 Hz, 4H), 7.37 (t, *J* = 7.32, 7.93 Hz, 4H), 7.30 (t, *J* = 6.10, 7.17 Hz, 2H), 7.17 (d, *J* = 8.24 Hz, 2H), 2.88 (t, *J* =

6.40, 6.40 Hz, 2H), 2.69-2.65 (q,  $J = 7.47, 7.62$  Hz, 2H), 2.33 (t,  $J = 6.25, 6.40$  Hz, 2H), 2.27 (s, 3H), 1.24 (t,  $J = 7.62, 7.62$  Hz, 3H);  $^{13}\text{C}$  NMR (75 MHz,  $\text{CDCl}_3$ ):  $\delta = 193.9, 144.2, 139.5, 138.2, 136.7, 136.0, 135.7, 132.5, 130.2, 129.0, 128.8, 128.7, 128.5, 128.1, 127.0, 126.6, 47.4, 27.1, 18.2$ ; IR (KBr):  $\nu$  3444, 3055, 2953, 1663, 1441, 1265, 703  $\text{cm}^{-1}$ ; MS (ESI) 449 (M+H). MS (ESI) 431 (M+H). ESI-HRMS obtained for  $\text{C}_{27}\text{H}_{27}\text{OS}_2$  (M+H) = 431.1485 (calculated: 431.1497).

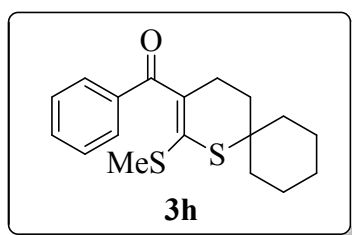

**(2-(methylthio)-1-thiaspiro[5.5]undec-2-en-3-**

**yl)(phenyl)methanone (3h):** Yield 79% (0.60 g), yellow liquid;  $^1\text{H}$  NMR (300 MHz,  $\text{CDCl}_3$ ):  $\delta = 7.82$  (d,  $J = 7.01$  Hz, 2H), 7.54 (t,  $J = 7.32, 7.47$  Hz, 1H), 7.45 (t,  $J = 7.62, 7.32$  Hz, 2H), 2.55 (t,  $J = 6.56, 6.56$  Hz, 2H), 2.19 (s, 3H), 1.95-1.91 (m, 4H), 1.73-1.62 (m, 6H), 1.56-1.50 (m, 2H);  $^{13}\text{C}$  NMR (75 MHz,  $\text{CDCl}_3$ ):  $\delta = 197.2, 137.5, 133.8, 132.6, 128.9, 128.5, 49.8, 37.4, 35.0, 25.9, 25.7, 22.0, 17.9$ ; IR (thin film):  $\nu$  3059, 2926, 2854, 1660, 1446, 1264, 703  $\text{cm}^{-1}$ ; MS (ESI) 319 (M+H). ESI-HRMS obtained for  $\text{C}_{18}\text{H}_{23}\text{OS}_2$  (M+H) = 319.11813 (calculated: 319.1184).

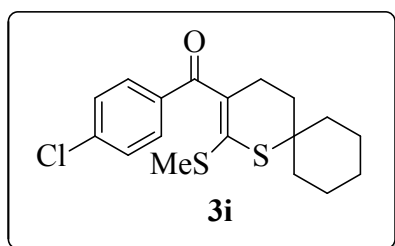

**(4-chlorophenyl)(2-(methylthio)-1-thiaspiro[5.5]undec-2-**

**en-3-yl)methanone (3i):** Yield 80 % (0.58 g), yellow liquid;  $^1\text{H}$  NMR (300 MHz,  $\text{CDCl}_3$ ):  $\delta = 7.74$  (d,  $J = 8.55$  Hz, 2H), 7.42 (d,  $J = 8.55$  Hz, 2H), 2.53 (t,  $J = 6.48, 6.60$  Hz, 2H), 2.19 (s, 3H), 1.93-1.89 (m, 4H), 1.71-1.61 (m, 6H), 1.56-1.49 (m, 2H);  $^{13}\text{C}$  NMR (75 MHz,  $\text{CDCl}_3$ ):  $\delta = 195.9, 138.9, 136.0, 133.4, 133.0, 130.2, 128.8, 50.0, 37.4, 35.0, 25.9, 25.6, 22.0, 17.9$ ; IR

(thin film):  $\nu$  3060, 2927, 2857, 1662, 1448, 1265, 702  $\text{cm}^{-1}$ ; MS (ESI) 353 (M+H). ESI-HRMS obtained for  $\text{C}_{18}\text{H}_{22}\text{ClOS}_2$  (M+H) = 353.0791 (calculated: 353.0795).

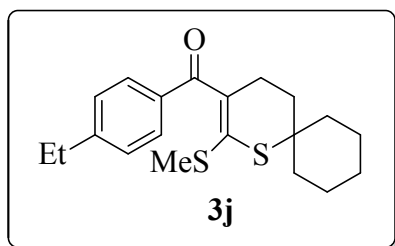

**(4-ethylphenyl)(2-(methylthio)-1-thiaspiro[5.5]undec-2-**

**en-3-yl)methanone (3j):** Yield 72% (0.52 g), yellow liquid;  $^1\text{H}$  NMR (300 MHz,  $\text{CDCl}_3$ ):  $\delta$  = 7.77 (d,  $J$  = 8.24 Hz, 2H), 7.29 (d,  $J$  = 8.24 Hz, 2H), 2.73-2.69 (q,  $J$  = 7.47, 7.63 Hz, 2H), 2.52 (t,  $J$  = 6.56, 6.56 Hz, 2H), 2.20 (s, 3H), 1.95-1.90 (m, 4H), 1.72-1.60 (m, 6H), 1.55-1.50 (m, 2H), 1.26 (t,  $J$  = 7.62, 7.62 Hz, 3H);  $^{13}\text{C}$  NMR (75 MHz,  $\text{CDCl}_3$ ):  $\delta$  = 197.1, 149.8, 134.8, 134.4, 130.5, 129.2, 128.1, 49.7, 37.4, 35.0, 28.9, 25.9, 25.7, 22.0, 18.0, 15.1; IR (thin film):  $\nu$  3058, 2922, 2855, 1661, 1443, 1262, 700  $\text{cm}^{-1}$ ; MS (ESI) 347 (M+H). ESI-HRMS obtained for  $\text{C}_{20}\text{H}_{27}\text{OS}_2$  (M+H) = 347.1494 (calculated: 347.1497).

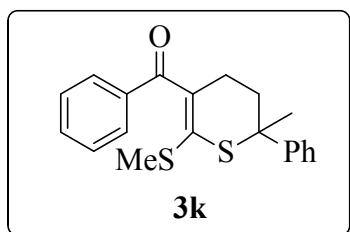

**(2-methyl-6-(methylthio)-2-phenyl-3,4-dihydro-2H-**

**thiopyran-5-yl)(phenyl)methanone (3k):** Yield 75% (0.60 g), pale yellow solid, mp 82-84  $^{\circ}\text{C}$ ;  $^1\text{H}$  NMR (300 MHz,  $\text{CDCl}_3$ ):  $\delta$  = 7.65-7.60 (m, 4H), 7.49 (t,  $J$  = 7.32, 7.47 Hz, 1H), 7.42 (t,  $J$  = 7.47, 7.93 Hz, 2H), 7.38-7.30 (m, 3H), 2.64-2.58 (m, 1H), 2.55-2.50 (m, 1H), 2.36-2.29 (m, 1H), 2.25-2.21 (m, 1H), 2.21 (s, 3H), 1.77 (s, 3H);  $^{13}\text{C}$  NMR (75 MHz,  $\text{CDCl}_3$ ):  $\delta$  = 197.3, 144.4, 137.2, 134.7, 132.7, 131.4, 128.8, 128.6, 128.4, 127.2, 126.4, 51.8, 35.7, 29.4, 27.0, 17.4; IR (KBr):  $\nu$  3447, 3052, 2958, 2923, 1665, 1444, 1235, 702  $\text{cm}^{-1}$ ; MS (ESI) 341 (M+H). ESI-HRMS obtained for  $\text{C}_{20}\text{H}_{21}\text{OS}_2$  (M+H) = 341.1024 (calculated: 341.1028).



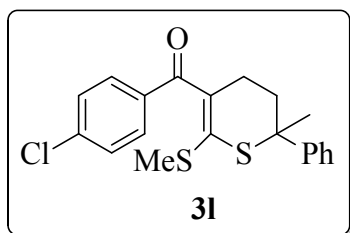

**(4-chlorophenyl)(2-methyl-6-(methylthio)-2-phenyl-3,4-**

**dihydro-2H-thiopyran-5-yl)methanone (3l):** Yield 72% (0.55 g), yellow liquid;  $^1\text{H}$  NMR (300 MHz,  $\text{CDCl}_3$ ):  $\delta = 7.62$  (d,  $J = 7.33$  Hz, 2H), 7.49 (d,  $J = 8.55$  Hz, 2H), 7.40 (t,  $J = 7.33$ , 8.06 Hz, 2H), 7.31 (t,  $J = 7.82$ , 8.43 Hz, 3H), 2.63-2.50 (m, 2H), 2.32-2.21 (m, 2H), 2.19 (s, 3H), 1.74 (s, 3H);  $^{13}\text{C}$  NMR (75 MHz,  $\text{CDCl}_3$ ):  $\delta = 195.8$ , 144.2, 138.8, 135.6, 134.0, 132.1, 130.0, 128.6, 128.5, 127.1, 126.3, 51.8, 35.6, 29.4, 26.9, 17.1; IR (thin film):  $\nu$  3448, 3055, 2960, 2923, 1667, 1443, 1234, 701  $\text{cm}^{-1}$ ; MS (ESI) 375 (M+H). ESI-HRMS obtained for  $\text{C}_{20}\text{H}_{20}\text{ClOS}_2$  (M+H) = 375.0640 (calculated: 375.0638).

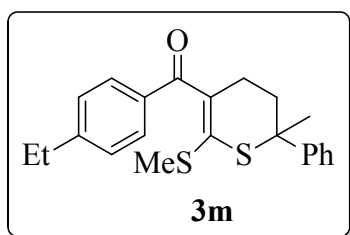

**(4-ethylphenyl)(2-methyl-6-(methylthio)-2-phenyl-3,4-**

**dihydro-2H-thiopyran-5-yl)methanone (3m):** Yield 70 % (0.54 g), yellow liquid;  $^1\text{H}$  NMR (300 MHz,  $\text{CDCl}_3$ ):  $\delta = 7.63$  (d,  $J = 7.33$  Hz, 2H), 7.56 (d,  $J = 8.19$  Hz, 2H), 7.41 (t,  $J = 7.33$ , 7.94 Hz, 2H), 7.31 (t,  $J = 7.21$ , 7.33 Hz, 1H), 7.18 (d,  $J = 8.19$  Hz, 2H), 2.70-2.64 (q,  $J = 7.70$ , 7.58 Hz, 2H), 2.59-2.49 (m, 2H), 2.34-2.23 (m, 2H), 2.21 (s, 3H), 1.76 (s, 3H), 1.23 (t,  $J = 7.58$ , 7.58 Hz, 3H);  $^{13}\text{C}$  NMR (75 MHz,  $\text{CDCl}_3$ ):  $\delta = 187.0$ , 145.6, 137.4, 137.0, 134.6, 133.5, 133.4, 132.8, 129.3, 128.9, 128.7, 128.4, 127.6, 127.3, 126.7, 126.6, 57.7, 18.6; IR (thin film):  $\nu$  3448, 2965, 2923, 1658, 1602, 1266, 698  $\text{cm}^{-1}$ ; MS (ESI) 369 (M+H). ESI-HRMS obtained for  $\text{C}_{22}\text{H}_{25}\text{OS}_2$  (M+H) = 369.1341 (calculated: 369.1341).

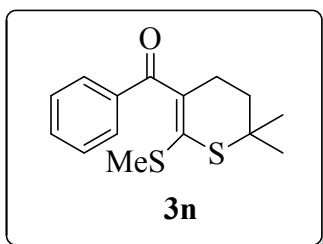

**(2,2-dimethyl-6-(methylthio)-3,4-dihydro-2H-thiopyran-5-**

**yl)(phenyl)methanone (3n):** Yield 68 % (0.48 g), yellow liquid;  $^1\text{H}$  NMR (300 MHz,  $\text{CDCl}_3$ ):  $\delta$  = 7.77 (d,  $J$  = 6.96 Hz, 2H), 7.47 (t,  $J$  = 7.21, 7.45 Hz, 1H), 7.39 (t,  $J$  = 7.58, 7.21 Hz, 2H), 2.51 (t,  $J$  = 6.60, 6.48 Hz, 2H), 2.09 (s, 3H), 1.78 (t,  $J$  = 6.60, 6.60 Hz, 2H), 1.37 (s, 6H);  $^{13}\text{C}$  NMR (75 MHz,  $\text{CDCl}_3$ ):  $\delta$  = 197.2, 137.4, 133.2, 132.7, 132.2, 128.9, 128.5, 44.7, 35.9, 29.0, 26.7, 17.7; IR (thin film):  $\nu$  3449, 2962, 2923, 1658, 1262, 1109, 801  $\text{cm}^{-1}$ ; MS (ESI) 279 (M+H). ESI-HRMS obtained for  $\text{C}_{15}\text{H}_{19}\text{OS}_2$  (M+H) = 279.0910 (calculated: 279.0871).

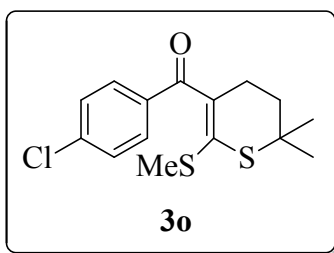

**(4-chlorophenyl)(2,2-dimethyl-6-(methylthio)-3,4-dihydro-2H-**

**thiopyran-5-yl)methanone (3o):** Yield 70 % (0.45 g), pale yellow solid, mp 97-99  $^{\circ}\text{C}$ ;  $^1\text{H}$  NMR (300 MHz,  $\text{CDCl}_3$ ):  $\delta$  = 7.69 (d,  $J$  = 8.55 Hz, 2H), 7.35 (d,  $J$  = 8.55, 7.45 Hz, 2H), 2.50 (t,  $J$  = 6.60, 6.48 Hz, 2H), 2.10 (s, 3H), 1.78 (t,  $J$  = 6.48, 6.60 Hz, 2H), 1.36 (s, 6H);  $^{13}\text{C}$  NMR (75 MHz,  $\text{CDCl}_3$ ):  $\delta$  = 195.9, 139.0, 136.0, 133.3, 132.4, 130.2, 128.8, 44.8, 35.9, 29.0, 26.7, 17.6; IR (thin film):  $\nu$  3450, 2966, 2922, 1659, 1263, 1109, 803  $\text{cm}^{-1}$ ; MS (ESI) 313 (M+H). ESI-HRMS obtained for  $\text{C}_{15}\text{H}_{18}\text{OClS}_2$  (M+H) = 313.0477 (calculated: 313.0482).

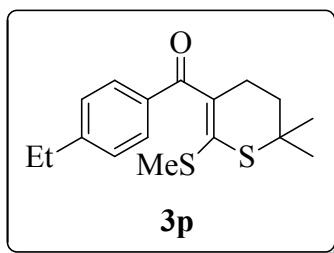

**(2,2-dimethyl-6-(methylthio)-3,4-dihydro-2H-thiopyran-5-**

**yl)(4-ethylphenyl)methanone (3p):** Yield 75% (0.48 g), yellow liquid;  $^1\text{H}$  NMR (300 MHz,  $\text{CDCl}_3$ ):  $\delta$  = 7.78 (d,  $J$  = 8.19 Hz, 2H), 7.29 (d,  $J$  = 8.19 Hz, 2H), 2.74-2.68 (q,  $J$  = 7.58, 7.58 Hz, 2H), 2.56 (t,  $J$  = 6.60, 6.48 Hz, 2H), 2.18 (s, 3H), 1.85 (t,  $J$  = 6.60, 6.60 Hz, 2H), 1.44 (s, 6H), 1.26 (t,  $J$  = 7.70, 7.58 Hz, 3H);  $^{13}\text{C}$  NMR (75 MHz,  $\text{CDCl}_3$ ):  $\delta$  = 197.1, 149.8, 134.8, 133.8, 130.5, 129.2, 128.0, 44.6, 35.9, 29.0, 28.9, 26.7, 17.8, 15.0; IR (thin film):  $\nu$  3451, 2965, 2921, 1661, 1261, 1109, 804  $\text{cm}^{-1}$ ; MS (ESI) 307 (M+H). ESI-HRMS obtained for  $\text{C}_{17}\text{H}_{23}\text{OS}_2$  (M+H) = 307.1180 (calculated: 307.1184).

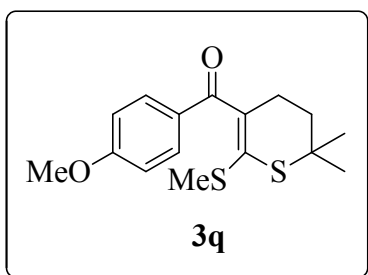

**(2,2-dimethyl-6-(methylthio)-3,4-dihydro-2H-thiopyran-5-**

**yl)(4-methoxyphenyl)methanone (3q):** Yield 68% (0.44 g), yellow liquid;  $^1\text{H}$  NMR (300 MHz,  $\text{CDCl}_3$ ):  $\delta$  = 7.85 (d,  $J$  = 8.85 Hz, 2H), 6.95 (d,  $J$  = 9.00 Hz, 2H), 3.87 (s, 3H), 2.56 (t,  $J$  = 6.56, 6.56 Hz, 2H), 2.19 (s, 3H), 1.85 (t,  $J$  = 6.56, 6.56 Hz, 2H), 1.43 (s, 6H);  $^{13}\text{C}$  NMR (75 MHz,  $\text{CDCl}_3$ ):  $\delta$  = 196.3, 163.5, 134.0, 131.4, 129.9, 129.5, 113.8, 55.4, 44.6, 35.9, 29.0, 26.8, 17.9; IR (thin film):  $\nu$  3449, 2965, 2921, 1655, 1266, 1111, 807  $\text{cm}^{-1}$ ; MS (ESI) 309 (M+H). ESI-HRMS obtained for  $\text{C}_{16}\text{H}_{21}\text{O}_2\text{S}_2$  (M+H) = 309.0974 (calculated: 309.0977).

7.843  
7.824  
7.553  
7.537  
7.522  
7.470  
7.455  
7.440

2.612  
2.599  
2.586  
2.155  
1.980  
1.967  
1.954  
1.905  
1.895  
1.795  
1.755  
1.730

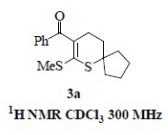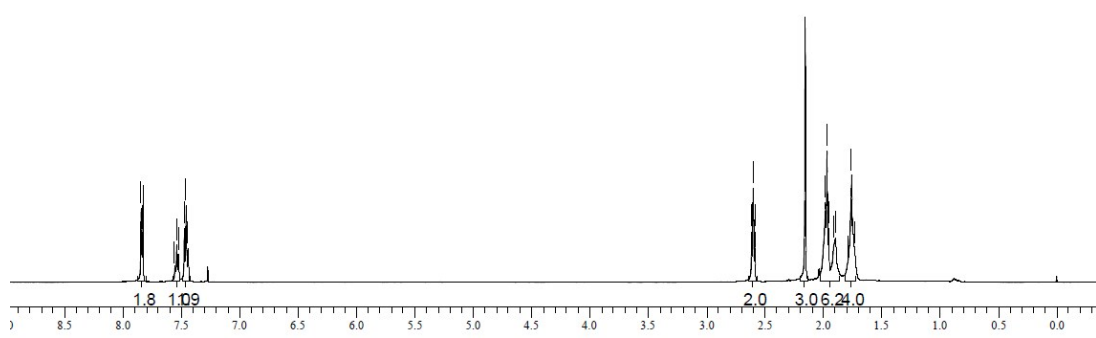

197.239

137.458  
133.747  
132.855  
132.650  
132.436  
128.941

55.617  
40.058  
34.256  
27.576  
24.231  
17.657

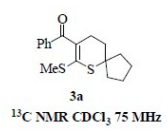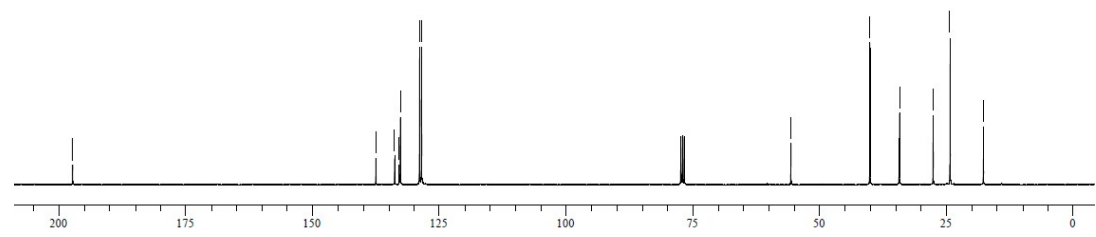

7.774  
7.757  
7.438  
7.421

2.601  
2.588  
2.575  
2.169  
1.981  
1.968  
1.955  
1.917  
1.901  
1.890  
1.781  
1.767  
1.744  
1.730

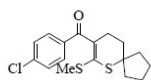

3b

<sup>1</sup>H NMR CDCl<sub>3</sub> 300 MHz

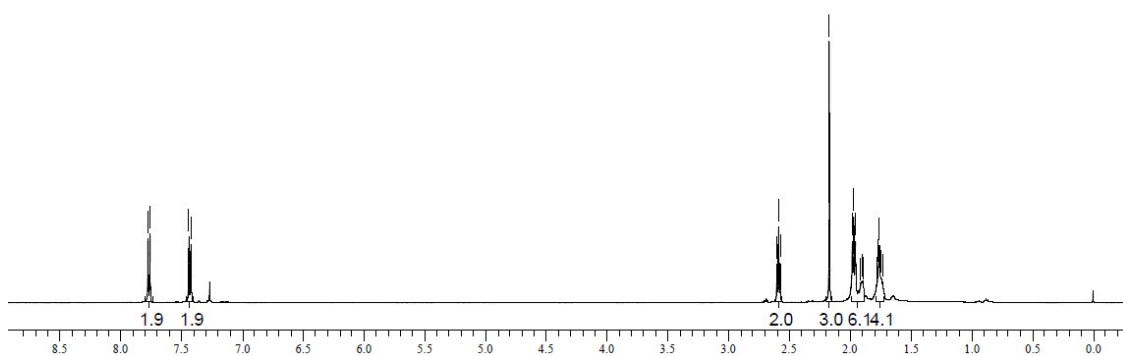

195.985

138.952  
136.048  
134.057  
132.994  
130.222  
128.812

55.748

40.105  
34.269  
27.549  
24.270  
17.676

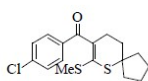

3b

<sup>13</sup>C NMR CDCl<sub>3</sub> 75 MHz

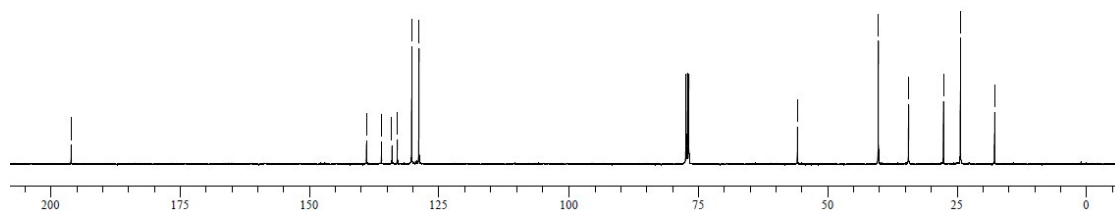

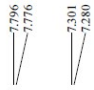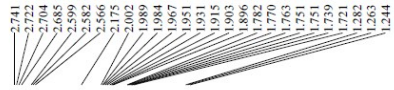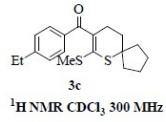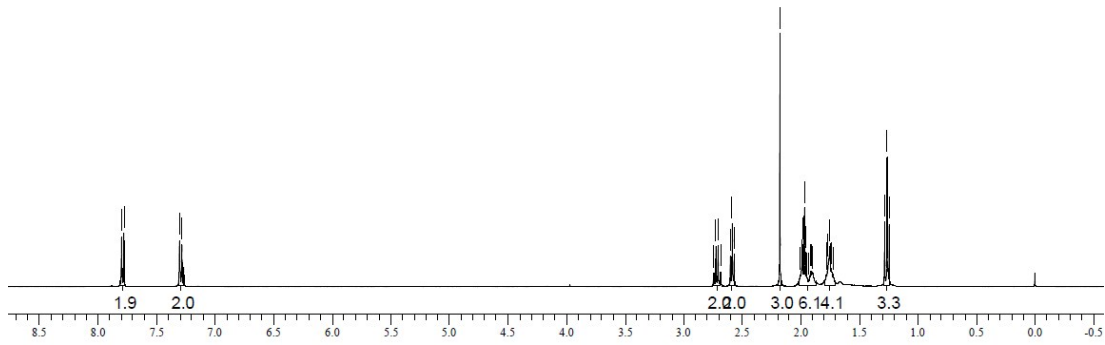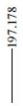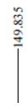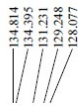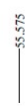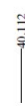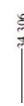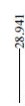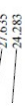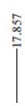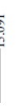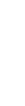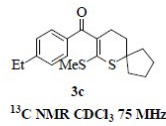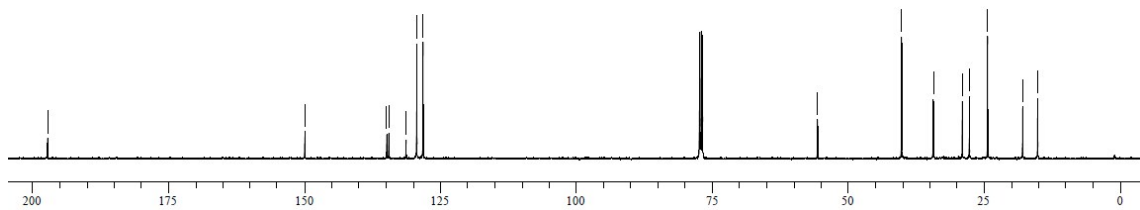

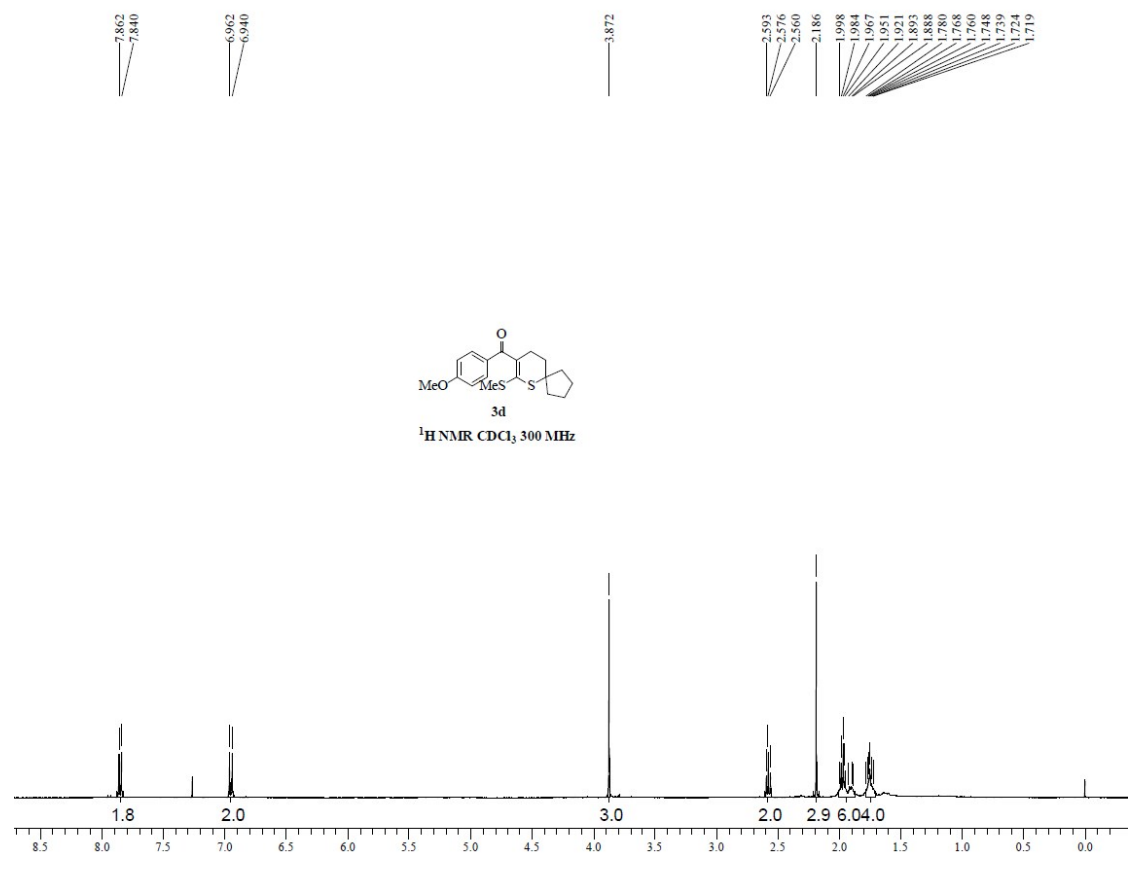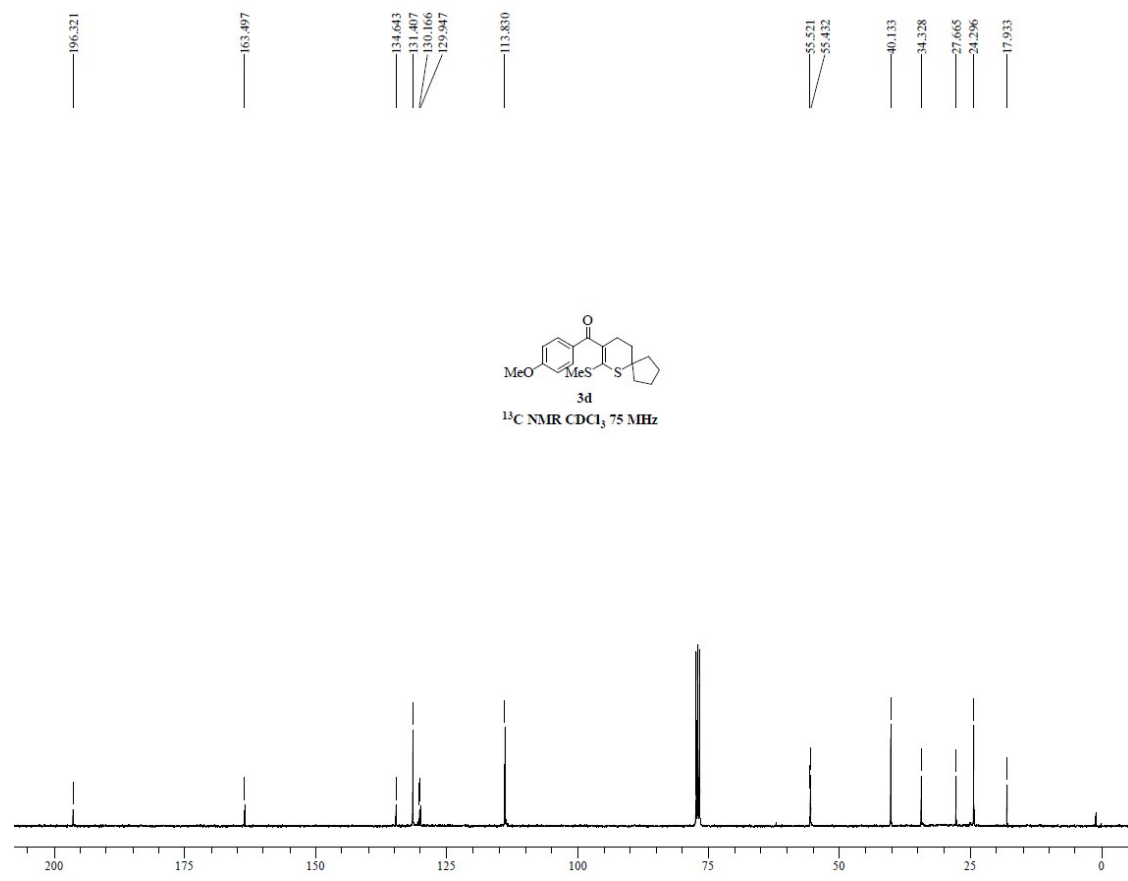

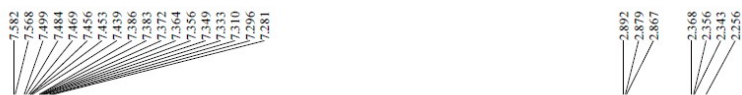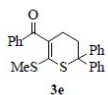

<sup>1</sup>H NMR CDCl<sub>3</sub> 300 MHz

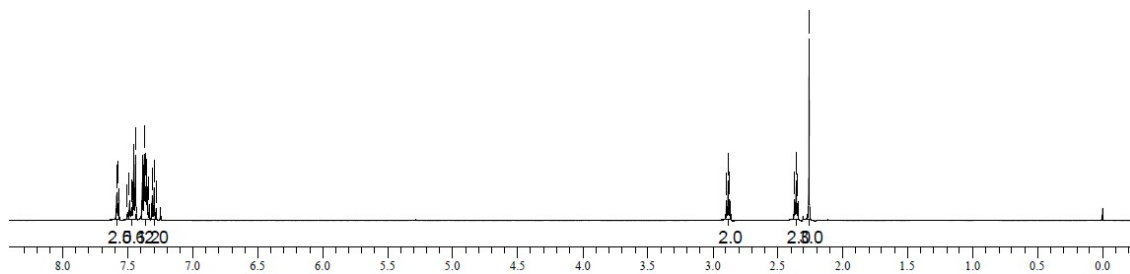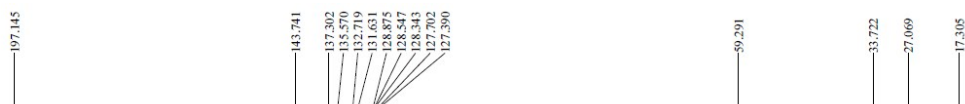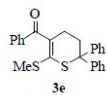

<sup>13</sup>C NMR CDCl<sub>3</sub> 75 MHz

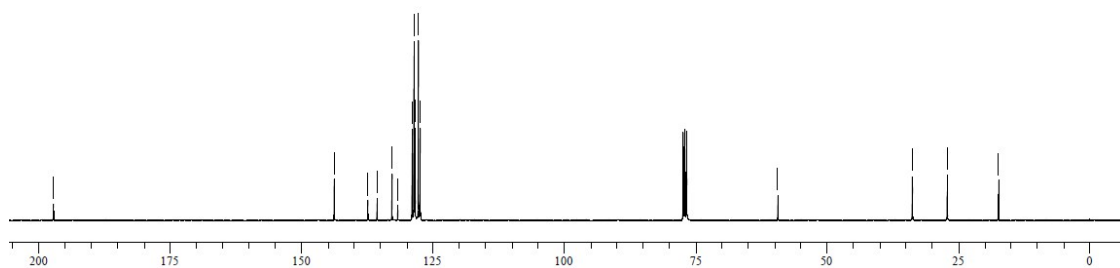



7.481  
7.464  
7.449  
7.434  
7.390  
7.375  
7.360  
7.319  
7.306  
7.302  
7.292

2.902  
2.889  
2.876  
2.265  
2.252  
2.239  
2.262

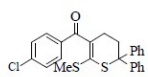

3f

$^1\text{H NMR CDCl}_3$  300 MHz

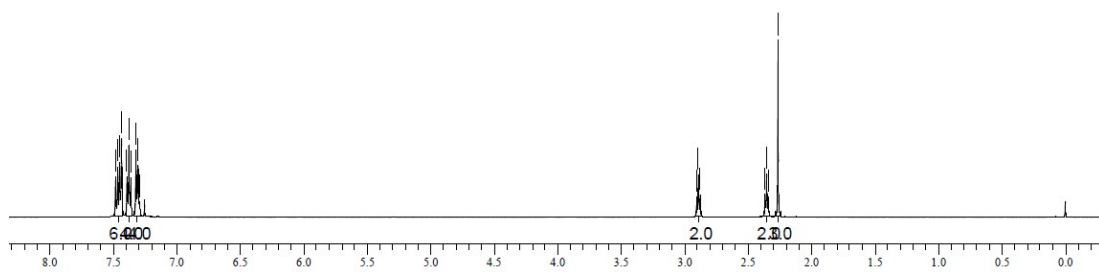

195.917

143.568  
139.039  
135.759  
134.884  
132.470  
130.219  
128.673  
128.601  
127.709  
127.485

59.355

33.754

27.074

17.218

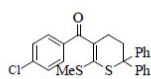

3f

$^{13}\text{C NMR CDCl}_3$  75 MHz

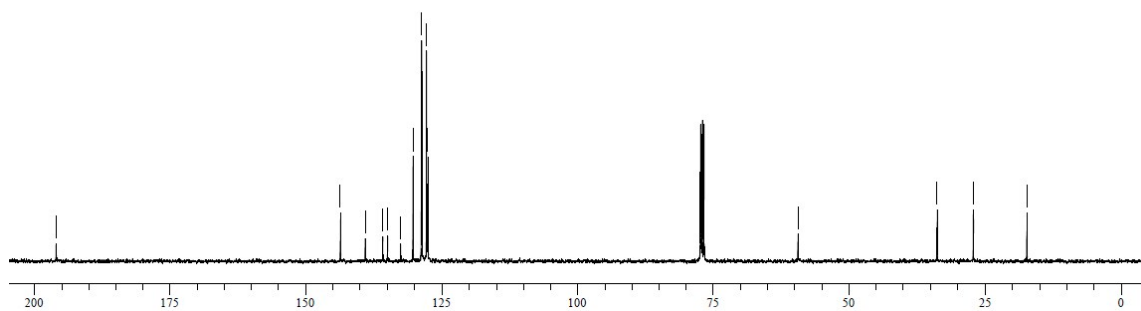

7.536  
7.519  
7.457  
7.439  
7.386  
7.372  
7.336  
7.313  
7.296  
7.281  
7.184  
7.167

2.886  
2.874  
2.861  
2.699  
2.684  
2.669  
2.654  
2.345  
2.332  
2.320  
2.276

1.237  
1.241  
1.226

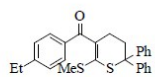

**3g**  
<sup>1</sup>H NMR CDCl<sub>3</sub> 300 MHz

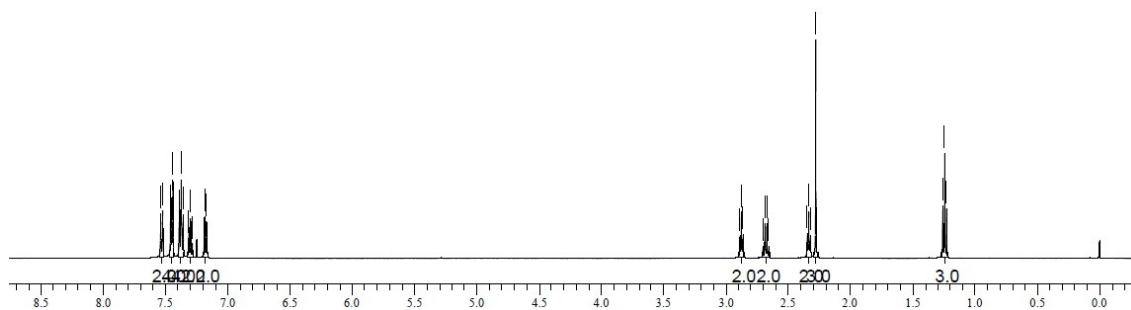

196.946

149.893

143.837

136.043

134.672

130.306

129.240

128.543

127.922

127.711

127.361

59.201

33.696

28.935

27.083

17.451

15.097

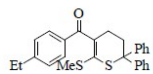

**3g**  
<sup>13</sup>C NMR CDCl<sub>3</sub> 75 MHz

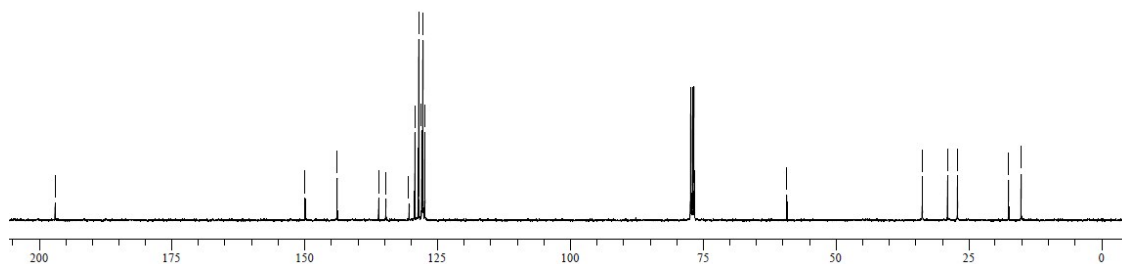

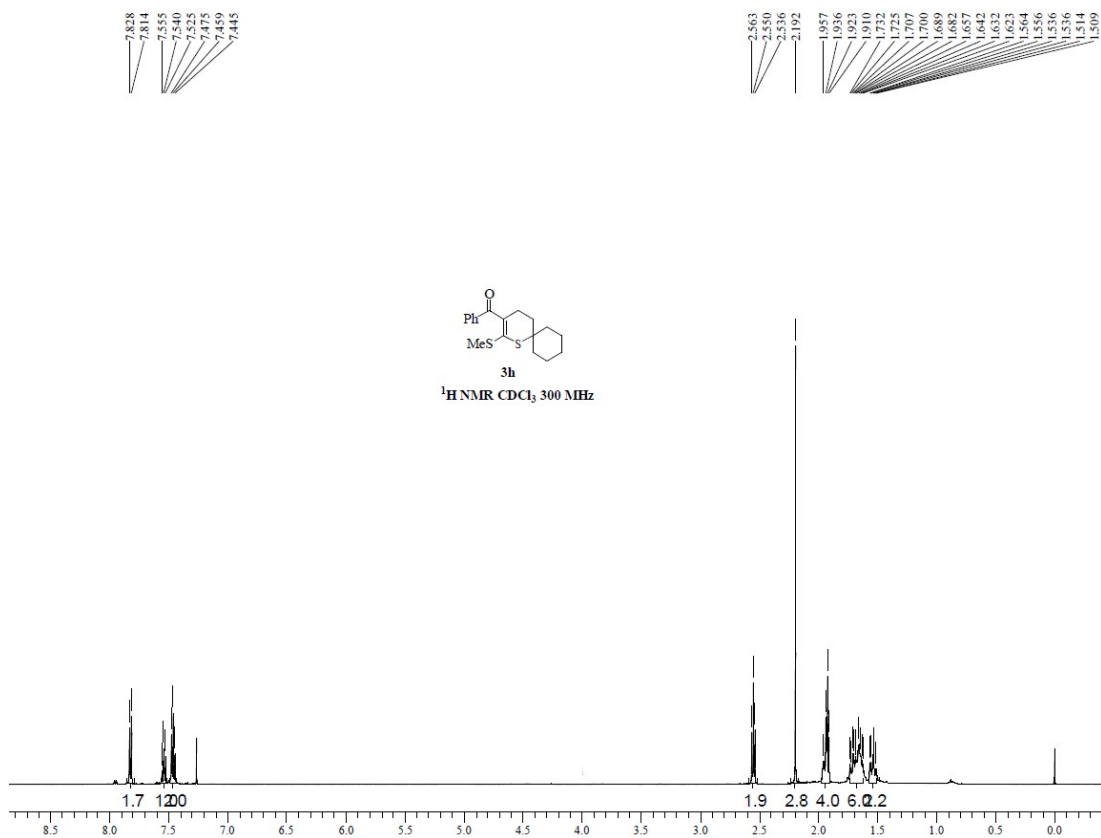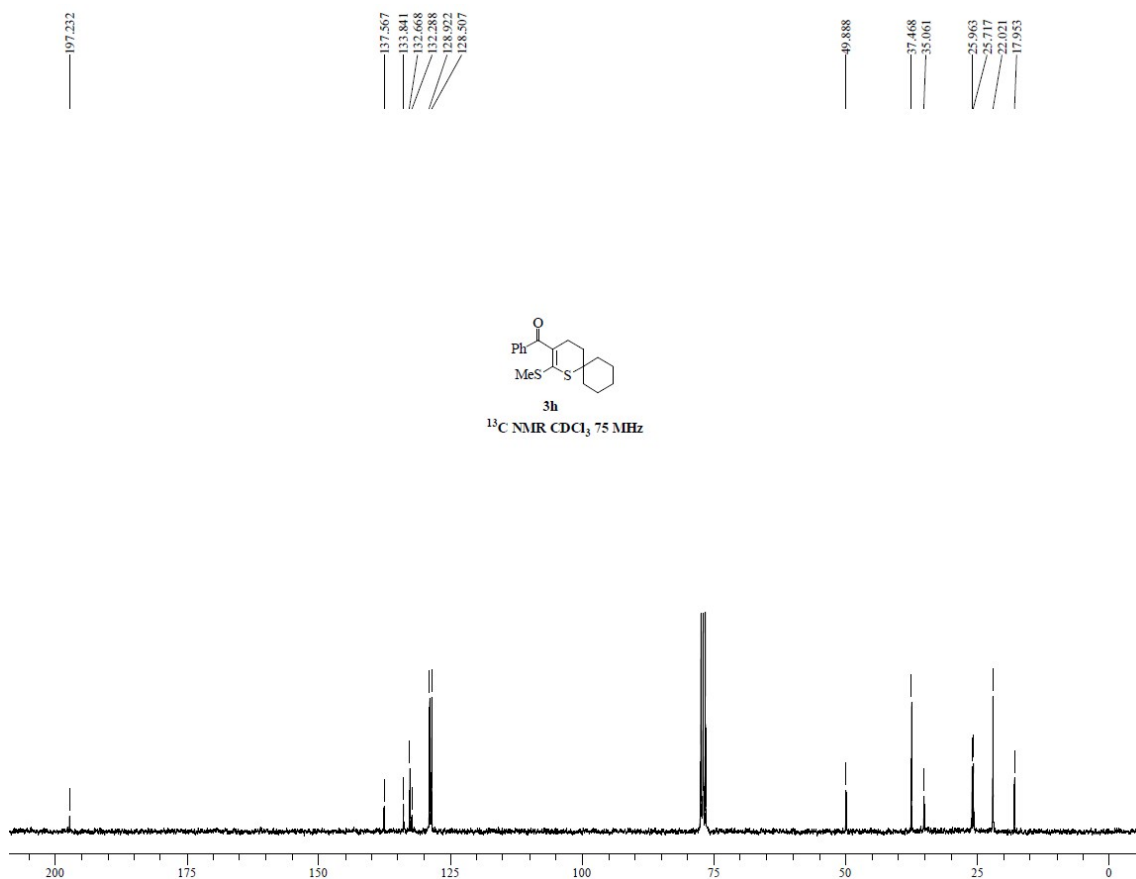

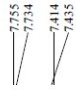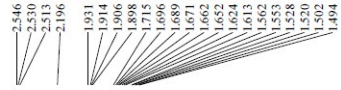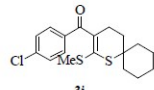

**3i**  
 $^1\text{H}$  NMR  $\text{CDCl}_3$  300 MHz

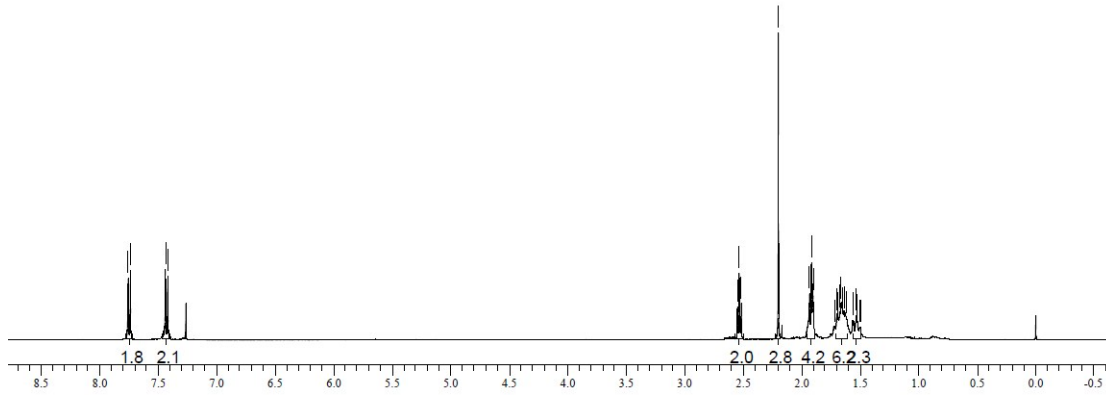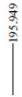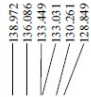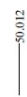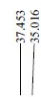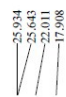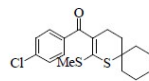

**3i**  
 $^{13}\text{C}$  NMR  $\text{CDCl}_3$  75 MHz

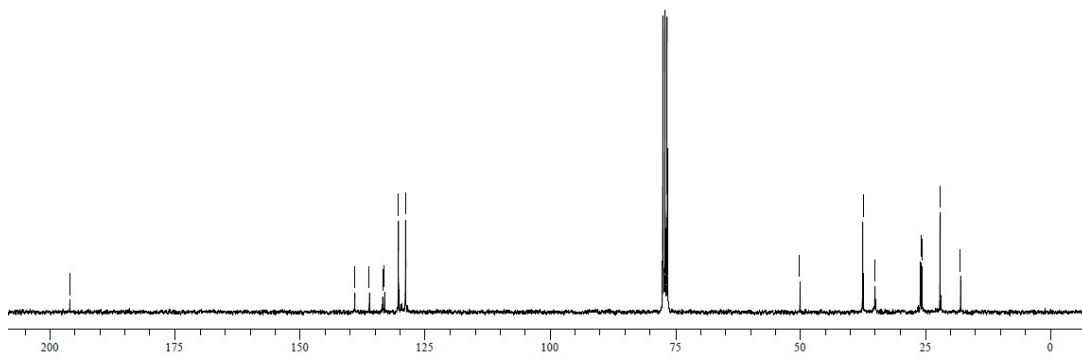

7.779  
7.762  
7.209  
7.283

2.735  
2.720  
2.705  
2.690  
2.541  
2.528  
2.515  
2.502  
1.937  
1.931  
1.918  
1.905  
1.725  
1.706  
1.688  
1.671  
1.649  
1.632  
1.616  
1.584  
1.547  
1.527  
1.506  
1.278  
1.263  
1.248

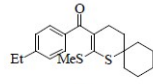

3j  
<sup>1</sup>H NMR CDCl<sub>3</sub> 300 MHz

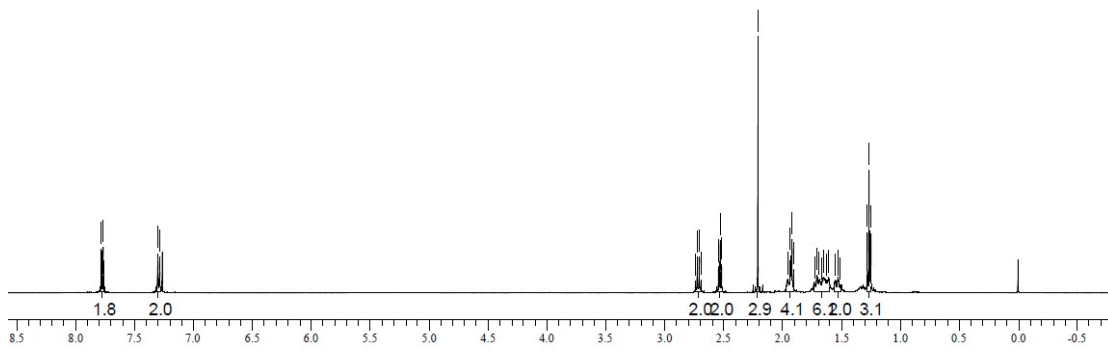

197.156

149.841

134.858  
134.409  
130.597  
129.283  
128.105

49.767

37.435  
35.065  
28.964  
25.982  
22.011  
18.089  
15.104

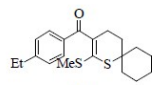

3j  
<sup>13</sup>C NMR CDCl<sub>3</sub> 75 MHz

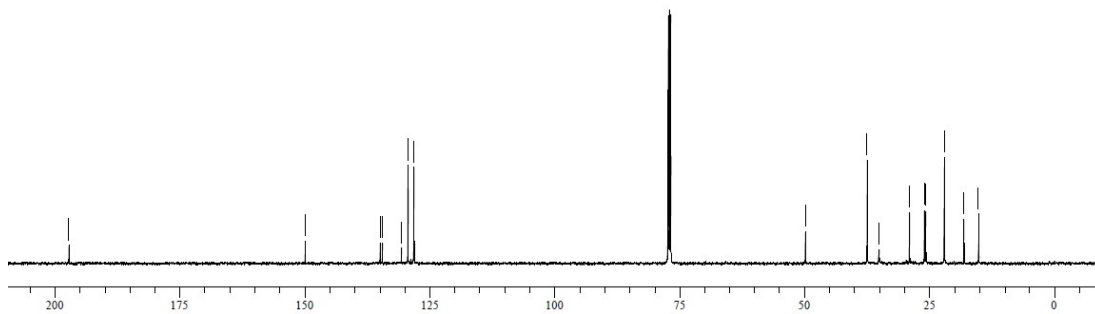

7.650  
7.633  
7.633  
7.607  
7.512  
7.497  
7.482  
7.435  
7.420  
7.404  
7.381  
7.365  
7.356  
7.332  
7.309

2.644  
2.632  
2.621  
2.607  
2.595  
2.585  
2.580  
2.540  
2.528  
2.524  
2.513  
2.501  
2.362  
2.351  
2.344  
2.334  
2.324  
2.314  
2.308  
2.297  
2.251  
2.241  
2.224  
2.210  
1.778

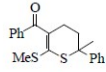

3k

<sup>1</sup>H NMR CDCl<sub>3</sub> 300 MHz

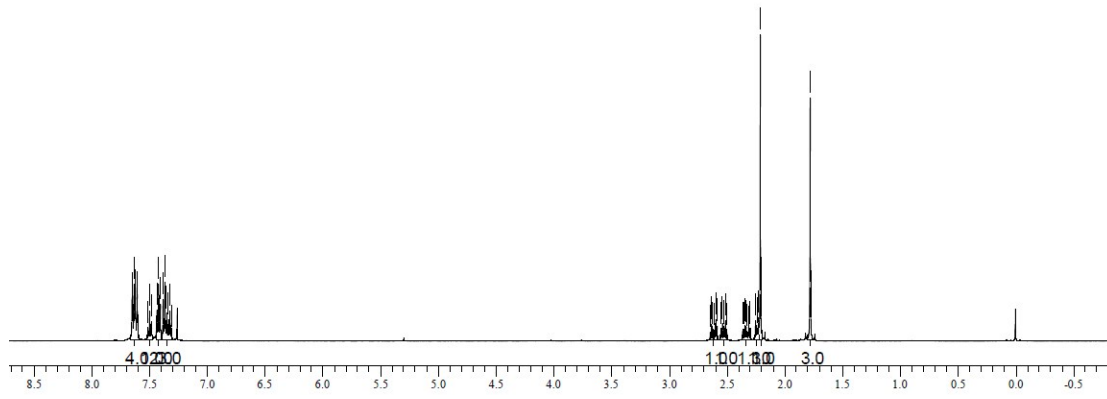

197.316

144.431  
137.276  
134.697  
132.733  
131.471  
128.892  
128.625  
128.409  
127.246  
126.431

51.861

35.772

29.419

27.095

17.446

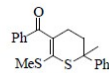

3k

<sup>13</sup>C NMR CDCl<sub>3</sub> 75 MHz

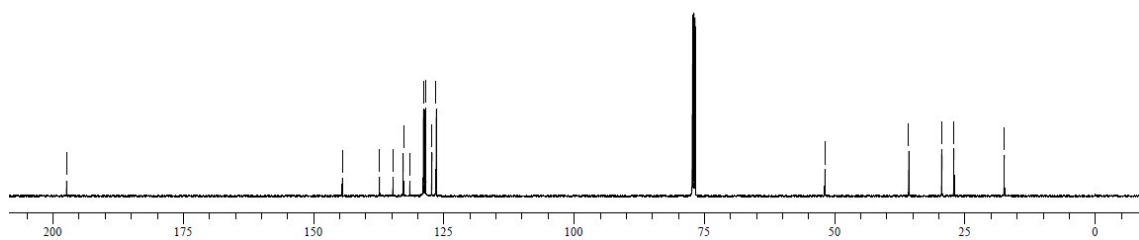

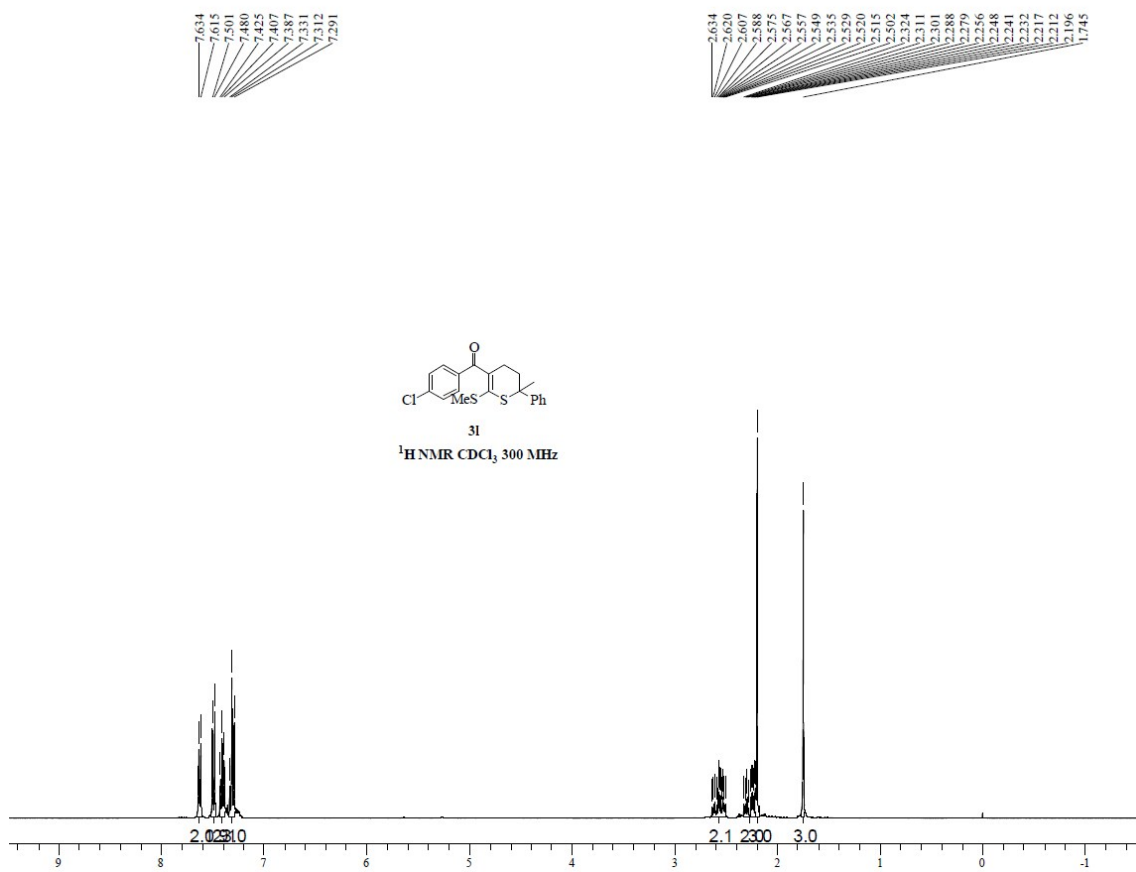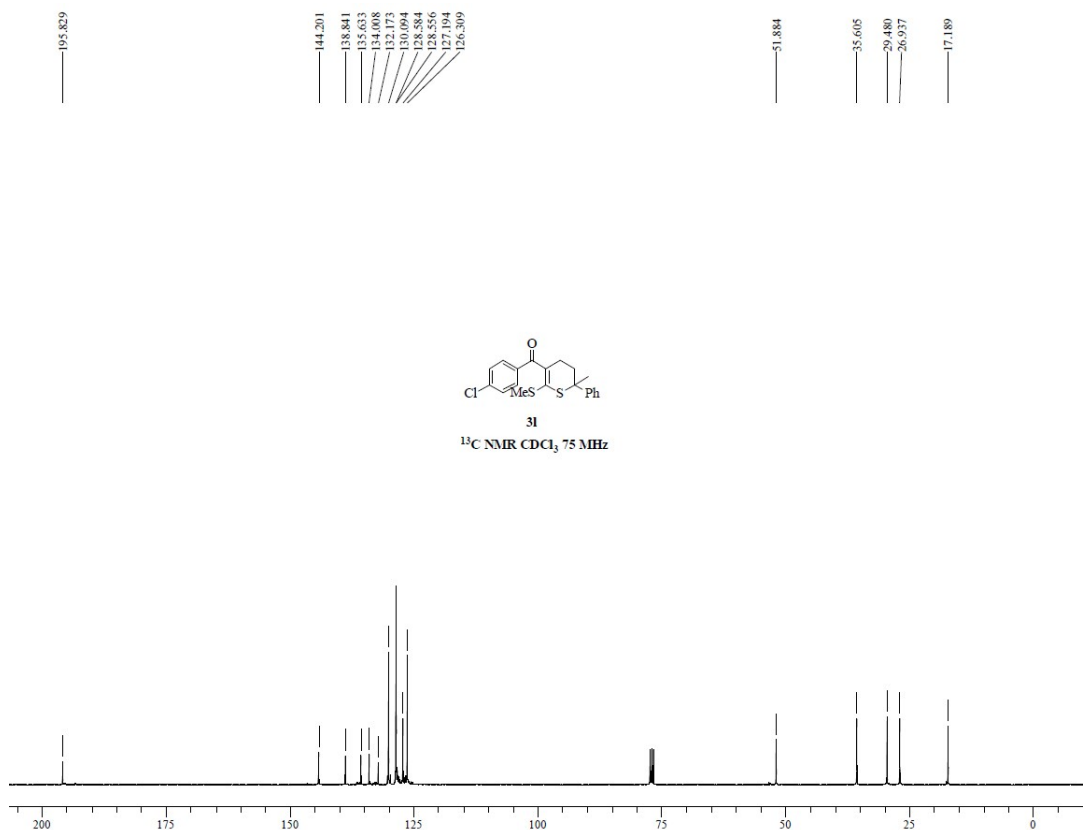

7.642  
7.635  
7.574  
7.554  
7.428  
7.410  
7.390  
7.328  
7.310  
7.294  
7.195  
7.174

2.701  
2.682  
2.663  
2.644  
2.592  
2.574  
2.560  
2.548  
2.533  
2.522  
2.489  
2.480  
2.344  
2.330  
2.321  
2.309  
2.286  
2.276  
2.269  
2.237  
2.219  
1.765  
1.254  
1.235  
1.216

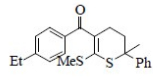

**3m**  
<sup>1</sup>H NMR CDCl<sub>3</sub> 300 MHz

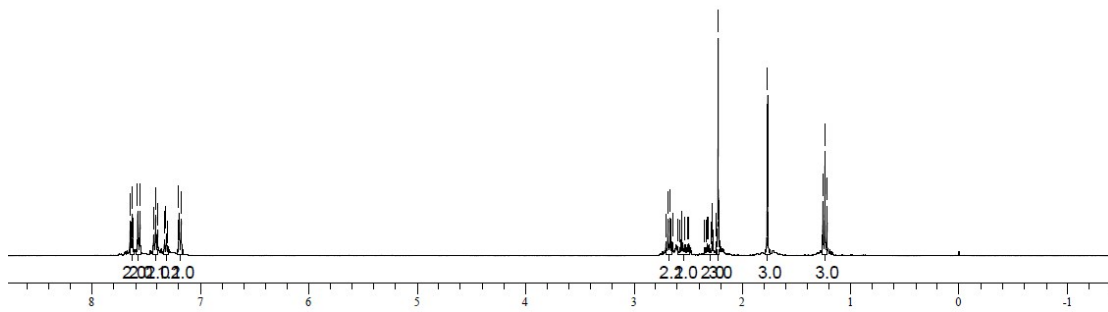

197.028

149.828

144.484

135.145

134.627

130.044

129.196

128.571

127.946

127.173

126.391

51.710

35.732

29.360

28.893

27.087

17.536

15.060

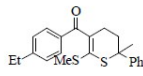

**3m**  
<sup>13</sup>C NMR CDCl<sub>3</sub> 75 MHz

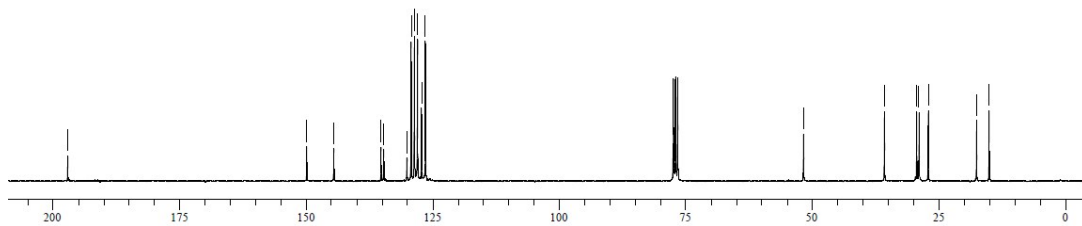



7.778  
7.761  
7.493  
7.475  
7.456  
7.409  
7.390  
7.372

2.534  
2.518  
2.502  
2.097  
1.804  
1.788  
1.771  
1.374

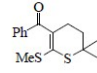

3n

$^1\text{H NMR CDCl}_3$  300 MHz

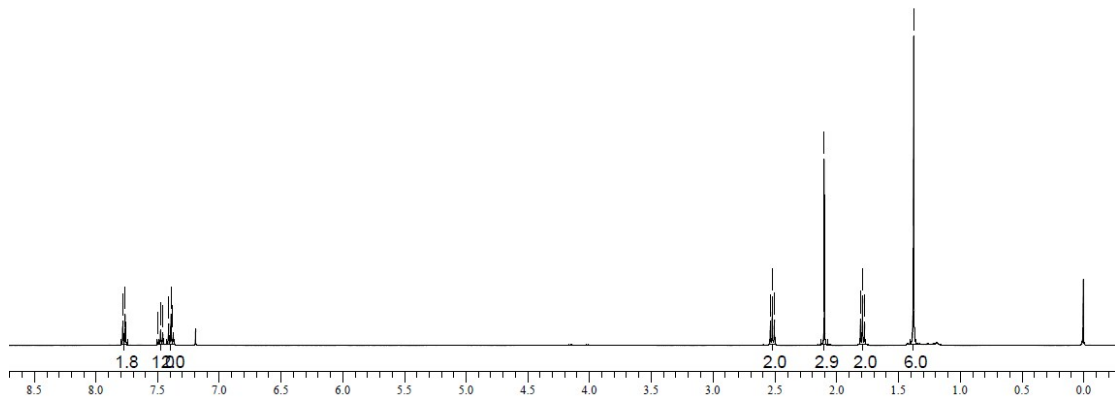

197.298

137.479  
133.214  
132.732  
132.202  
128.900  
128.520

44.776  
35.997  
29.036  
26.788  
17.750

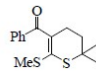

3n

$^{13}\text{C NMR CDCl}_3$  75 MHz

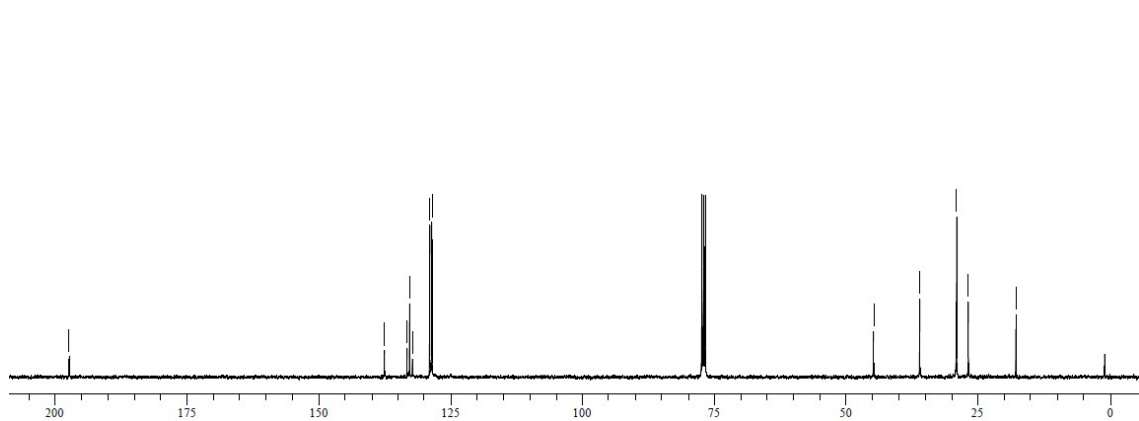

7.705  
7.684  
7.367  
7.346

2.517  
2.500  
2.484  
2.103  
1.799  
1.783  
1.766  
1.366

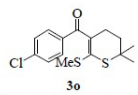

<sup>1</sup>H NMR CDCl<sub>3</sub> 300 MHz

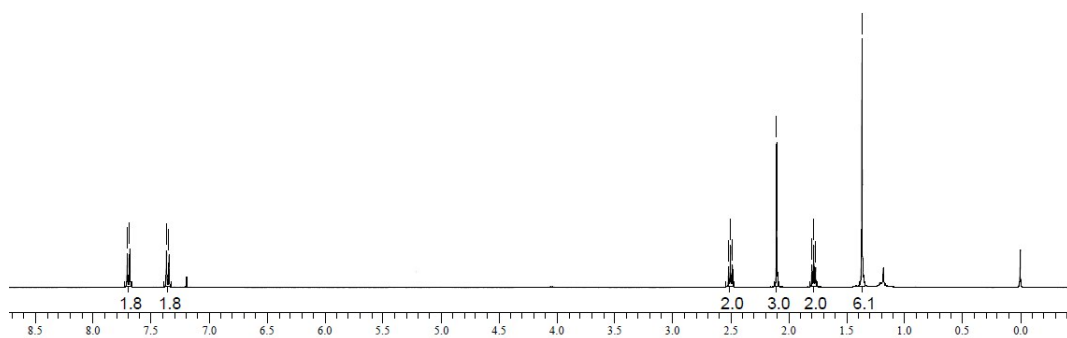

194.963

139.009  
136.007  
133.425  
132.423  
130.230  
128.843

44.874  
35.952  
29.005  
26.702  
17.698

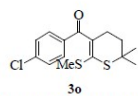

<sup>13</sup>C NMR CDCl<sub>3</sub> 75 MHz

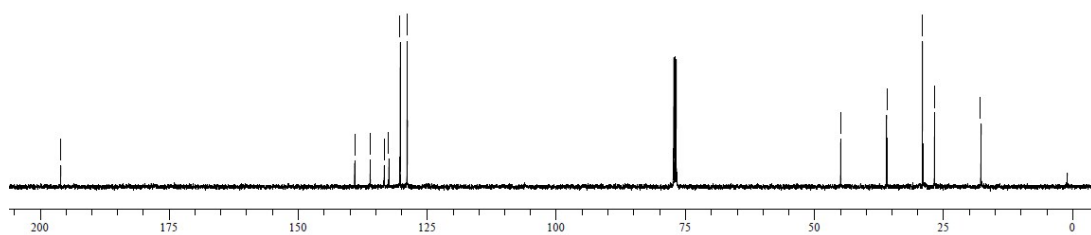

7.797  
7.777  
7.300  
7.279

2.741  
2.722  
2.703  
2.684  
2.583  
2.567  
2.550  
2.183  
1.869  
1.852  
1.836  
1.440  
1.282  
1.263  
1.244

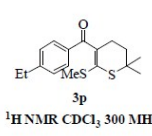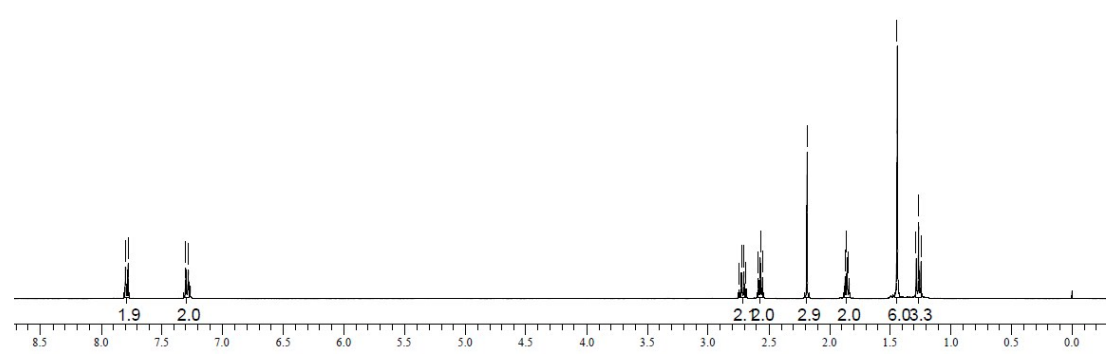

197.135

149.879

134.815  
133.804  
130.576  
129.253  
128.099

44.663

35.983

26.036  
26.016  
26.795  
17.879  
15.092

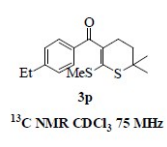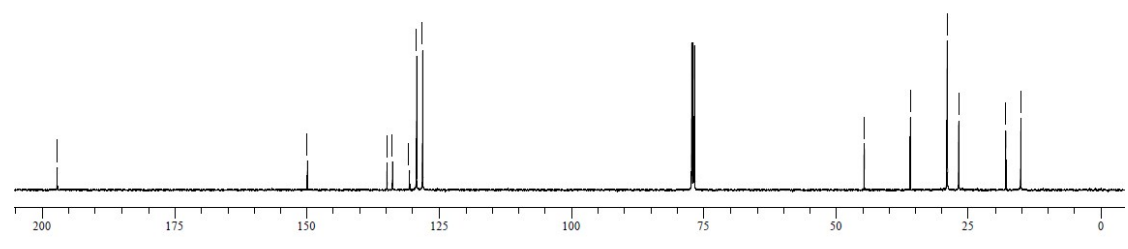

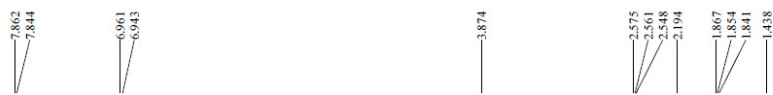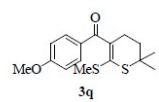

<sup>1</sup>H NMR CDCl<sub>3</sub> 300 MHz

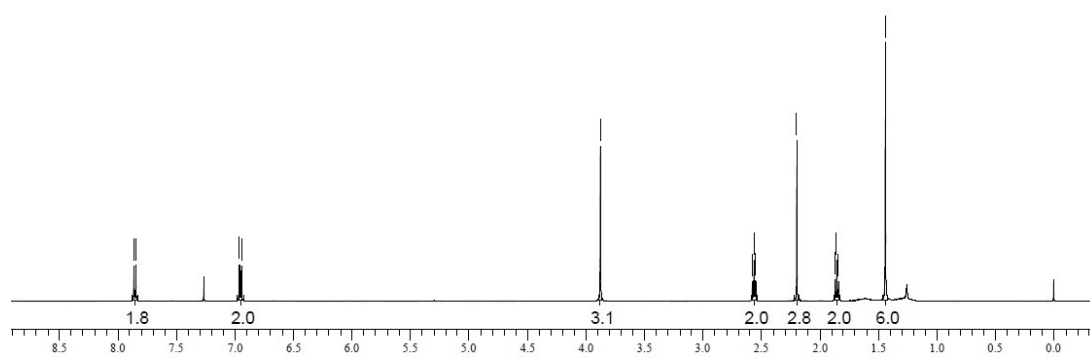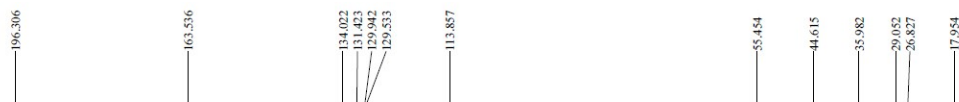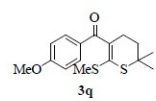

<sup>13</sup>C NMR CDCl<sub>3</sub> 75 MHz

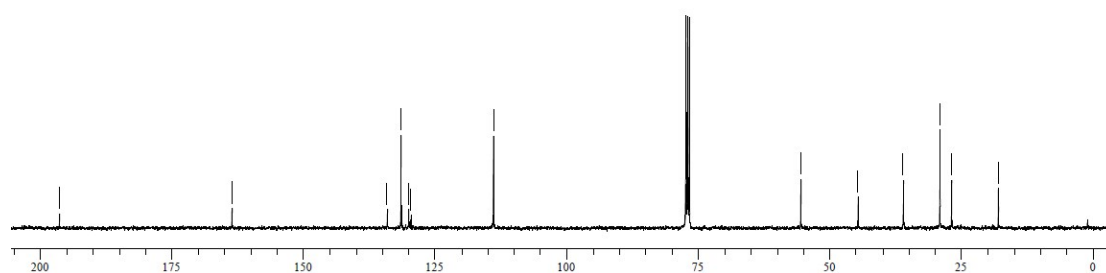

Supplement: c7nj03025h1.pdf [file c7nj03025h1.pdf]
